# Supplementary material
Source: PubMed Central journal article supplement (PMC2258186)

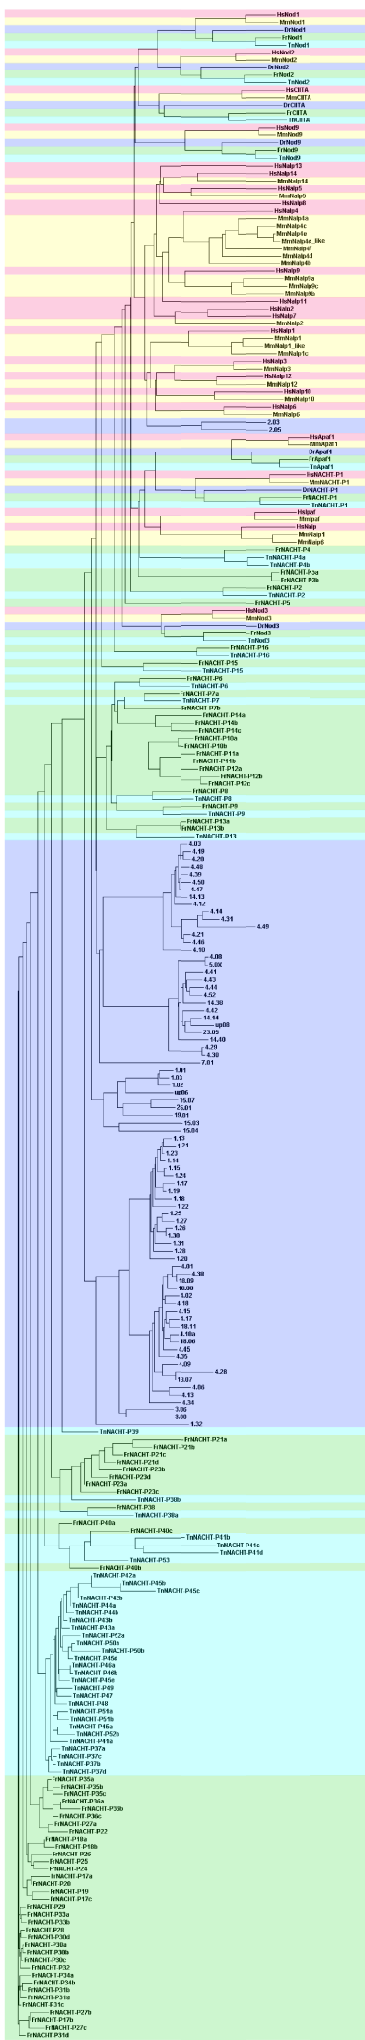

Nod1  
Nod2  
CIITA  
Nod9

mammalian Nalp

Apaf1  
NACHT-P1  
Ipaf

Nod3

Fr/ Tn expansion

Dr expansion

Fr/ Tn expansion

Tn expansion

Fr expansion

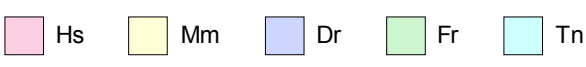

Supplement: gb-2007-8-11-r251-S10.pdf [file gb-2007-8-11-r251-S10.pdf]
